# Supplementary material for: Feasibility of the Manchester Acute Coronary Syndromes (MACS) decision rule to safely reduce unnecessary hospital admissions: a pilot randomised controlled trial
Source: PubMed Central journal article supplement (PMC5574380; doi:10.1136/emermed-2016-206148), 2017-05-12
Supplement: emermed-2016-206148supp001.pdf [file emermed-2016-206148supp001.pdf]

# Appendix

Supplementary Table 1: Findings of the patient satisfaction questionnaire administered at 30 days

| Characteristics                                                       |                        | All<br>N = 127       | Treatment<br>N = 66  | Control<br>N = 61   | p-value |
|-----------------------------------------------------------------------|------------------------|----------------------|----------------------|---------------------|---------|
| <b>The urgency with which you were assessed</b>                       | N (non-missing)        | 115                  | 57                   | 58                  | 0.80    |
|                                                                       | Missing (% , [95% CI]) | 12 (9 % , [5 to 16]) | 9 (14 % , [6 to 24]) | 3 (5 % , [1 to 14]) |         |
|                                                                       | Mean (SD)              | 3.89 (0.96)          | 3.88 (0.89)          | 3.90 (1.04)         |         |
|                                                                       | Median (IQR)           | 4.00 (3.00 to 5.00)  | 4.00 (3.00 to 5.00)  | 4.00 (3.00 to 5.00) |         |
|                                                                       | Min - Max              | 1.00 - 5.00          | 2.00 - 5.00          | 1.00 - 5.00         |         |
| <b>The thoroughness of your assessment</b>                            | N (non-missing)        | 115                  | 57                   | 58                  | 0.41    |
|                                                                       | Missing (% , [95% CI]) | 12 (9 % , [5 to 16]) | 9 (14 % , [6 to 24]) | 3 (5 % , [1 to 14]) |         |
|                                                                       | Mean (SD)              | 3.83 (1.01)          | 3.77 (0.91)          | 3.88 (1.11)         |         |
|                                                                       | Median (IQR)           | 4.00 (3.00 to 5.00)  | 4.00 (3.00 to 4.00)  | 4.00 (3.00 to 5.00) |         |
|                                                                       | Min - Max              | 1.00 - 5.00          | 2.00 - 5.00          | 1.00 - 5.00         |         |
| <b>Explanations given to you about medical procedures &amp; tests</b> | N (non-missing)        | 115                  | 57                   | 58                  | 0.34    |
|                                                                       | Missing (% , [95% CI]) | 12 (9 % , [5 to 16]) | 9 (14 % , [6 to 24]) | 3 (5 % , [1 to 14]) |         |
|                                                                       | Mean (SD)              | 3.58 (1.13)          | 3.47 (1.15)          | 3.69 (1.11)         |         |
|                                                                       | Median (IQR)           | 4.00 (3.00 to 5.00)  | 3.00 (3.00 to 4.00)  | 4.00 (3.00 to 5.00) |         |
|                                                                       | Min - Max              | 1.00 - 5.00          | 1.00 - 5.00          | 1.00 - 5.00         |         |
| <b>Attention given to what you have to say</b>                        | N (non-missing)        | 115                  | 57                   | 58                  | 0.22    |
|                                                                       | Missing (% , [95% CI]) | 12 (9 % , [5 to 16]) | 9 (14 % , [6 to 24]) | 3 (5 % , [1 to 14]) |         |
|                                                                       | Mean (SD)              | 3.60 (1.11)          | 3.47 (1.14)          | 3.72 (1.09)         |         |
|                                                                       | Median (IQR)           | 4.00 (3.00 to 5.00)  | 3.00 (3.00 to 4.00)  | 4.00 (3.00 to 5.00) |         |
|                                                                       | Min - Max              | 1.00 - 5.00          | 1.00 - 5.00          | 1.00 - 5.00         |         |
| <b>Advice you got about ways to avoid illness and stay healthy</b>    | N (non-missing)        | 115                  | 57                   | 58                  | 0.07    |
|                                                                       | Missing (% , [95% CI]) | 12 (9 % , [5 to 16]) | 9 (14 % , [6 to 24]) | 3 (5 % , [1 to 14]) |         |

| Characteristics                                                   | .                      | All<br>N = 127       | Treatment<br>N = 66  | Control<br>N = 61   | p-value |
|-------------------------------------------------------------------|------------------------|----------------------|----------------------|---------------------|---------|
|                                                                   | Mean (SD)              | 2.78 (1.24)          | 2.98 (1.14)          | 2.59 (1.31)         |         |
|                                                                   | Median (IQR)           | 3.00 (2.00 to 4.00)  | 3.00 (2.00 to 4.00)  | 3.00 (1.00 to 3.00) |         |
|                                                                   | Min - Max              | 1.00 - 5.00          | 1.00 - 5.00          | 1.00 - 5.00         |         |
| <b>Friendliness &amp; courtesy shown to you by hospital staff</b> | N (non-missing)        | 115                  | 57                   | 58                  | 0.79    |
|                                                                   | Missing (% , [95% CI]) | 12 (9 % , [5 to 16]) | 9 (14 % , [6 to 24]) | 3 (5 % , [1 to 14]) |         |
|                                                                   | Mean (SD)              | 4.01 (0.92)          | 4.00 (0.87)          | 4.02 (0.98)         |         |
|                                                                   | Median (IQR)           | 4.00 (3.00 to 5.00)  | 4.00 (3.00 to 5.00)  | 4.00 (3.00 to 5.00) |         |
|                                                                   | Min - Max              | 1.00 - 5.00          | 2.00 - 5.00          | 1.00 - 5.00         |         |
| <b>Personal interest in you &amp; your medical problems</b>       | N (non-missing)        | 115                  | 57                   | 58                  | 0.40    |
|                                                                   | Missing (% , [95% CI]) | 12 (9 % , [5 to 16]) | 9 (14 % , [6 to 24]) | 3 (5 % , [1 to 14]) |         |
|                                                                   | Mean (SD)              | 3.61 (1.03)          | 3.54 (0.96)          | 3.67 (1.10)         |         |
|                                                                   | Median (IQR)           | 4.00 (3.00 to 4.00)  | 3.00 (3.00 to 4.00)  | 4.00 (3.00 to 5.00) |         |
|                                                                   | Min - Max              | 1.00 - 5.00          | 1.00 - 5.00          | 1.00 - 5.00         |         |
| <b>Respect shown to you, and attention to your privacy</b>        | N (non-missing)        | 115                  | 57                   | 58                  | 0.41    |
|                                                                   | Missing (% , [95% CI]) | 12 (9 % , [5 to 16]) | 9 (14 % , [6 to 24]) | 3 (5 % , [1 to 14]) |         |
|                                                                   | Mean (SD)              | 3.81 (0.93)          | 3.75 (0.83)          | 3.86 (1.02)         |         |
|                                                                   | Median (IQR)           | 4.00 (3.00 to 5.00)  | 4.00 (3.00 to 4.00)  | 4.00 (3.00 to 5.00) |         |
|                                                                   | Min - Max              | 1.00 - 5.00          | 2.00 - 5.00          | 1.00 - 5.00         |         |
| <b>Reassurance &amp; support offered to you by hospital staff</b> | N (non-missing)        | 115                  | 57                   | 58                  | 0.88    |
|                                                                   | Missing (% , [95% CI]) | 12 (9 % , [5 to 16]) | 9 (14 % , [6 to 24]) | 3 (5 % , [1 to 14]) |         |
|                                                                   | Mean (SD)              | 3.51 (1.10)          | 3.53 (1.10)          | 3.50 (1.11)         |         |
|                                                                   | Median (IQR)           | 3.00 (3.00 to 4.00)  | 3.00 (3.00 to 4.00)  | 3.50 (3.00 to 4.00) |         |
|                                                                   | Min - Max              | 1.00 - 5.00          | 1.00 - 5.00          | 1.00 - 5.00         |         |
| <b>Amount of time the hospital staff gave you</b>                 | N (non-missing)        | 115                  | 57                   | 58                  | 0.77    |
|                                                                   | Missing (% , [95% CI]) | 12 (9 % , [5 to 16]) | 9 (14 % , [6 to 24]) | 3 (5 % , [1 to 14]) |         |
|                                                                   | Mean (SD)              | 3.58 (1.12)          | 3.61 (1.10)          | 3.55 (1.14)         |         |

| Characteristics                                                   |                        | All<br>N = 127       | Treatment<br>N = 66  | Control<br>N = 61   | p-value |
|-------------------------------------------------------------------|------------------------|----------------------|----------------------|---------------------|---------|
|                                                                   | Median (IQR)           | 4.00 (3.00 to 5.00)  | 4.00 (3.00 to 5.00)  | 3.50 (3.00 to 5.00) |         |
|                                                                   | Min - Max              | 1.00 - 5.00          | 1.00 - 5.00          | 1.00 - 5.00         |         |
| <b>Overall, how satisfied are you by the service you received</b> | N (non-missing)        | 115                  | 57                   | 58                  | 0.80    |
|                                                                   | Missing (% , [95% CI]) | 12 (9 % , [5 to 16]) | 9 (14 % , [6 to 24]) | 3 (5 % , [1 to 14]) |         |
|                                                                   | Mean (SD)              | 3.78 (1.03)          | 3.77 (0.96)          | 3.79 (1.10)         |         |
|                                                                   | Median (IQR)           | 4.00 (3.00 to 5.00)  | 4.00 (3.00 to 5.00)  | 4.00 (3.00 to 5.00) |         |
|                                                                   | Min - Max              | 1.00 - 5.00          | 2.00 - 5.00          | 1.00 - 5.00         |         |

Supplementary Table 2: Total length of stay in hospital (hours) by MACS risk group.

| MACS rule risk group | Number of patients admitted to hospital from the ED / Total<br>N=123 | Mean (SD) length of stay in hours: all patients | Intervention group: Number of patients admitted to hospital / Total<br>N= 60 | Intervention group: mean (SD) length of stay in hours | Control group: Number of patients admitted to hospital / Total<br>N=63 | Control group: mean (SD) length of stay in hours |
|----------------------|----------------------------------------------------------------------|-------------------------------------------------|------------------------------------------------------------------------------|-------------------------------------------------------|------------------------------------------------------------------------|--------------------------------------------------|
| Very low risk        | 8/28 (29%)                                                           | 6.9 (11.04)                                     | 1/12 (8%)                                                                    | 2.0 (6.93)                                            | 7/16(44%)                                                              | 10.5 (12.30)                                     |
| Low risk             | 18/35 (51%)                                                          | 17.8 (26.25)                                    | 7/18 (39%)                                                                   | 14.7 (28.68)                                          | 11/17 (65%)                                                            | 21.2 (23.82)                                     |
| Medium risk          | 40/56 (71%)                                                          | 52.3 (73.67)                                    | 22/28 (79%)                                                                  | 42.0 (49.58)                                          | 18/28 (64%)                                                            | 62.6 (91.53)                                     |
| High risk            | 4/4 (100%)                                                           | 474.0 (345.79)                                  | 2/2 (100%)                                                                   | 276.0 (84.85)                                         | 2/2 (100%)                                                             | 672.0 (441.23)                                   |
| Total                | 70/123 (56%)                                                         | 45.9 (110.50)                                   | 32/60 (53%)                                                                  | 33.6 (61.89)                                          | 38/63 (60%)                                                            | 57.5 (141.76)                                    |

Abbreviations: ED, Emergency Department; SD, standard deviation
